# Supplementary material for: Variations in the Abortive HIV-1 RNA Hairpin Do Not Impede Viral Sensing and Innate Immune Responses
Source: MDPI journal article supplement (doi:10.3390/pathogens10070897), 2021-07-15
Supplement: s1 [file s1]

**Table S1. Quantitative Real-Time PCR primers to analyze mRNA expression**

| Gene product    | Forward primer             | Reverse primer          |
|-----------------|----------------------------|-------------------------|
| <i>GAPDH</i>    | CCATGTTTCGTCATGGGTGTG      | GGTGCTAAGCAGTTGGTGGTG   |
| <i>IFNB</i>     | ACAGACTTACAGGTTACCTCCGAAAC | CATCTGCTGGTTGAAGAATGCTT |
| <i>APOBEC3G</i> | TTGAGCCTTGAATAATCTGCC      | TCGAGTGTCTGAGAATCTCCCC  |
| <i>IL27A</i>    | GCTTTGCGGAATCTCACCTG       | TGAAGCGTGGTGGAGATGAAG   |
| <i>ISG15</i>    | TTTGCCAGTACAGGAGCTTGTG     | GGGTGATCTGCGCCTTCA      |
| <i>IRF3</i>     | AAGGAGGCGTGTTTGACCTG       | CATAGCGTGGTGAGCGT       |
| <i>IRF7</i>     | GCTCCCCACGCTATACCATCTAC    | GCCAGGGTTCCAGCTTCAC     |
